# Supplementary material for: Investigation of adsorption and photocatalytic activities of in situ cetyltrimethylammonium bromide-modified Bi/BiOCl heterojunction photocatalyst for organic contaminants removal
Source: Royal Society of Chemistry journal article supplement (doi:10.1039/c6ra19904f), 2016-01-01
Supplement: c6ra19904f1.pdf [file c6ra19904f1.pdf]

**Investigation of adsorption and photocatalytic activities of in situ  
cetyltrimethylammonium bromide-modified Bi/BiOCl  
heterojunction photocatalyst for organic contaminants removal**

Wentao Li <sup>a,c</sup>, Feng Xiao <sup>a,\*</sup>, Hang Su <sup>b</sup>, Dongsheng Wang <sup>a</sup>, Xiaofang Yang<sup>a</sup>

<sup>a</sup> Key Laboratory of Drinking Water Science and Technology, Research Center for Eco-Environmental Sciences, University of Chinese Academy of Sciences, No.18, Shuangqing Road, Haidian District, Beijing, 100085, China

<sup>b</sup> School of Environmental and Municipal Engineering, Xi'an University of Architecture and Technology, Xi'an, 710055, China.

<sup>c</sup> University Chinese Academy of Sciences, Beijing 100085, China

\*Corresponding Author. Tel: +86 10 62849 138; Fax: +86 10 6284 9138

*E-mail address:* [fengxiao@rcees.ac.cn](mailto:fengxiao@rcees.ac.cn) (F. Xiao)

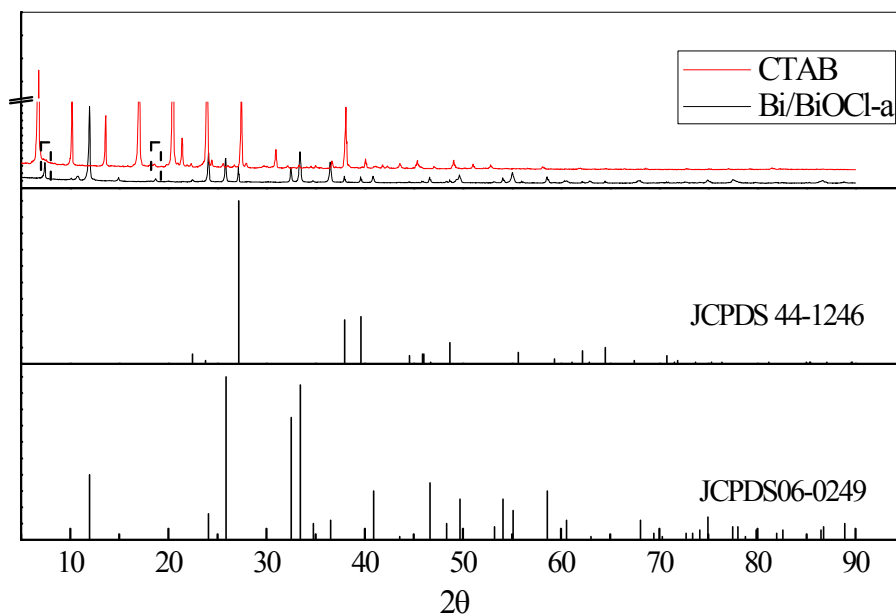

FigureS1. Standard XRD peaks of BiOCl structure (JCPDS 06-0249),Bi(JCPDS 44-1246)and XRD patterns of CTAB and Bi/BiOCl-a

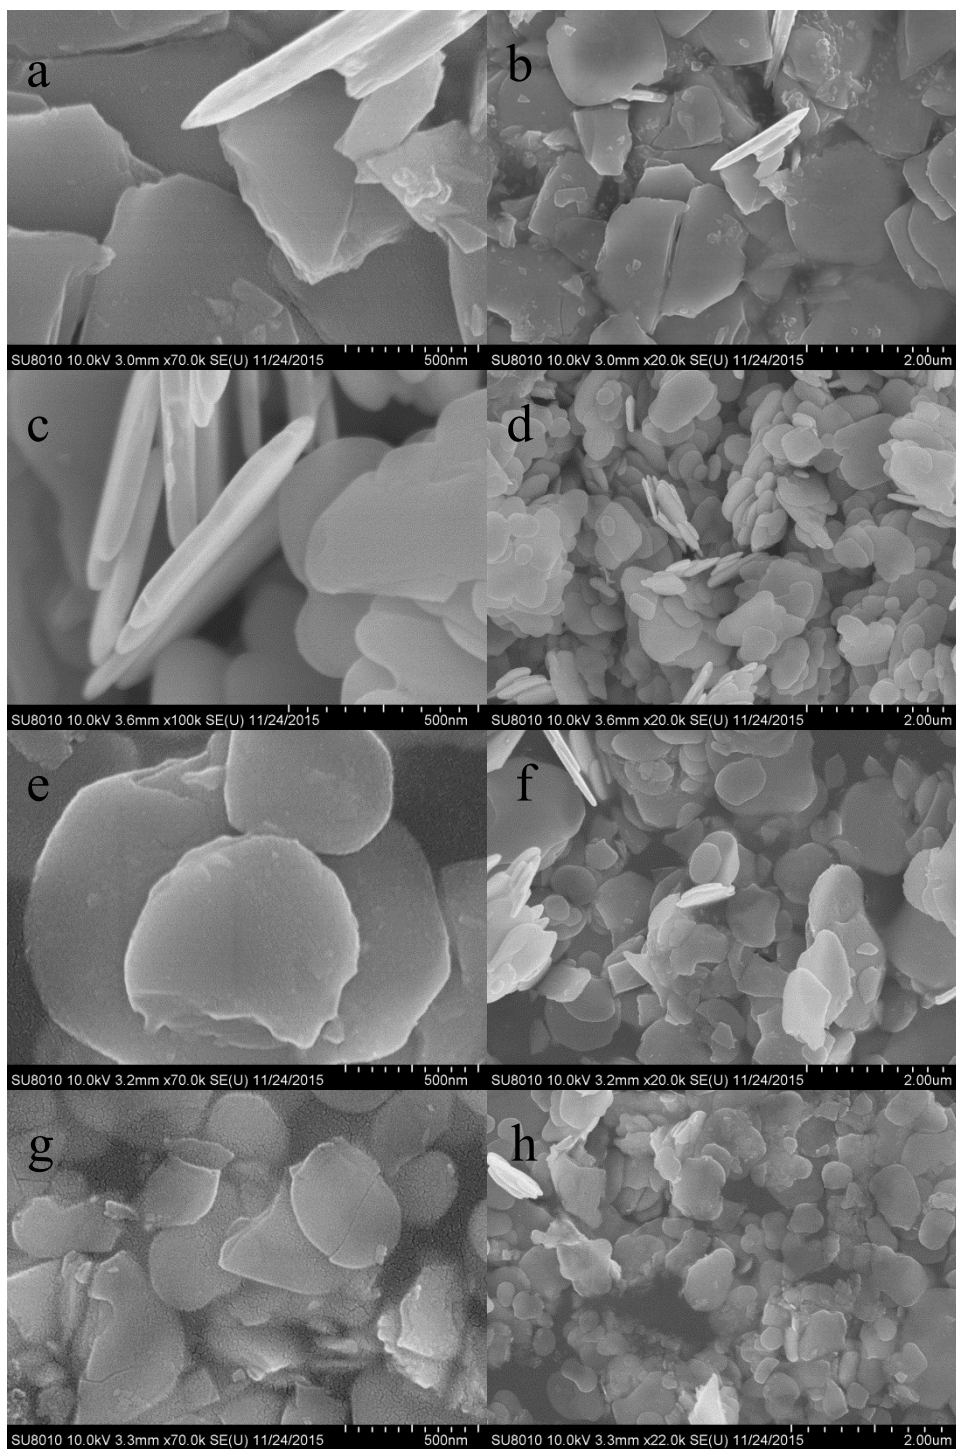

FigureS2. SEM of Bi/BiOCl and BiOCl: BiOCl (a, b); Bi/BiOCl-a(c, d); Bi/BiOCl-b (e, f);  
Bi/BiOCl-c (g, h)

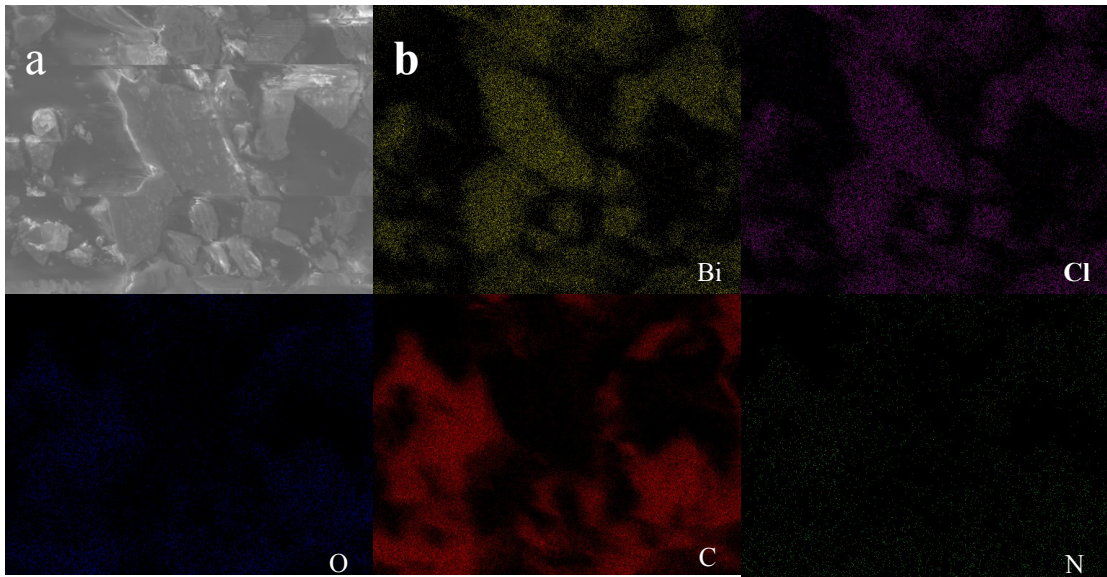

Figure S3. SEM(a) and EDS(b) mapping of Bi/BiOCl-a

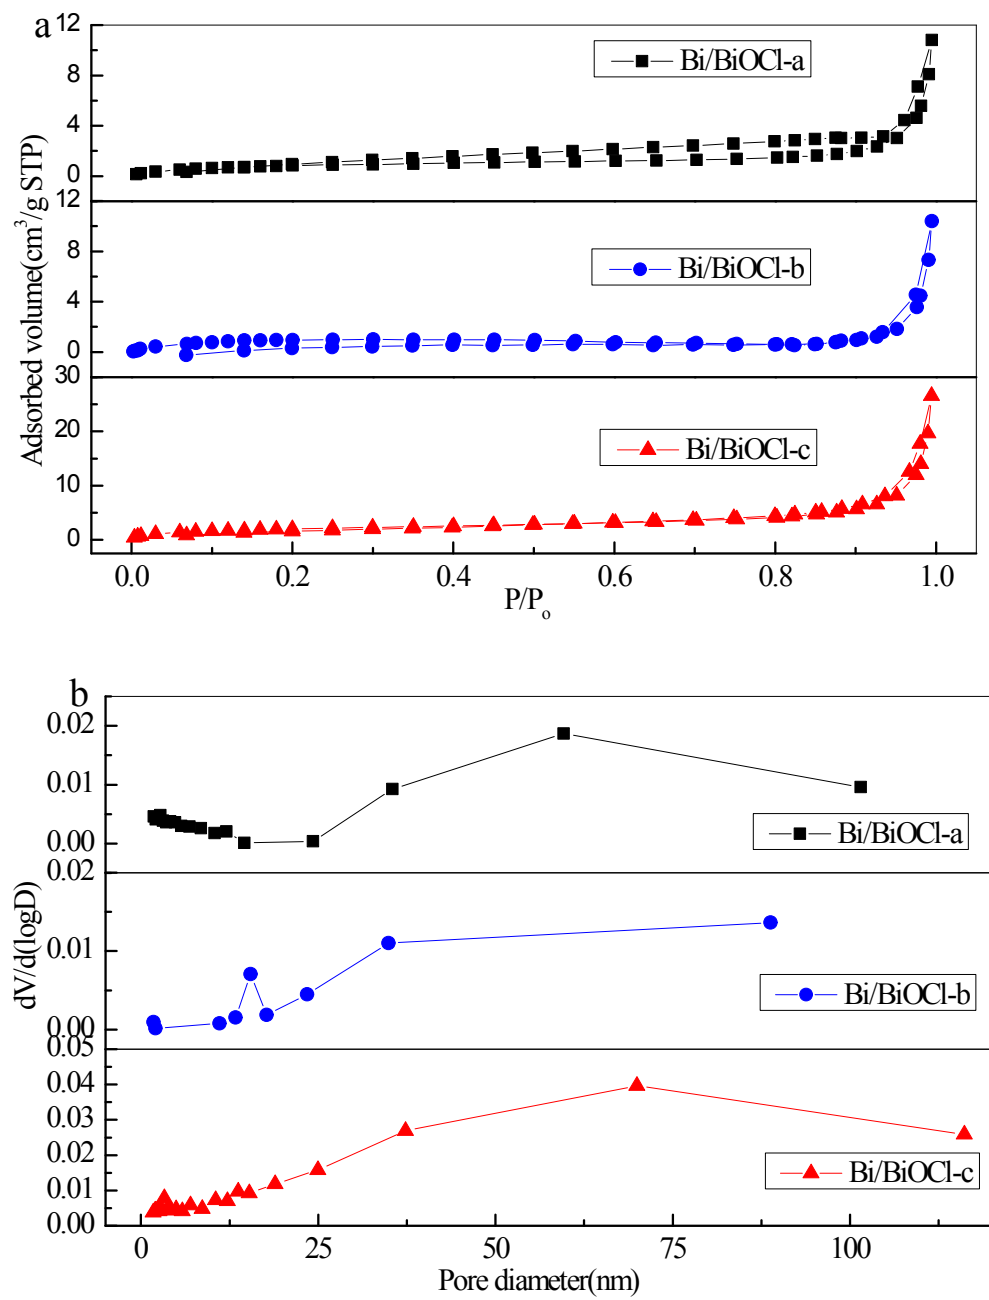

Figure S4. N<sub>2</sub> adsorption-desorption isotherms(a) and pore size distribution(b) of Bi/BiOCl -a, b, c

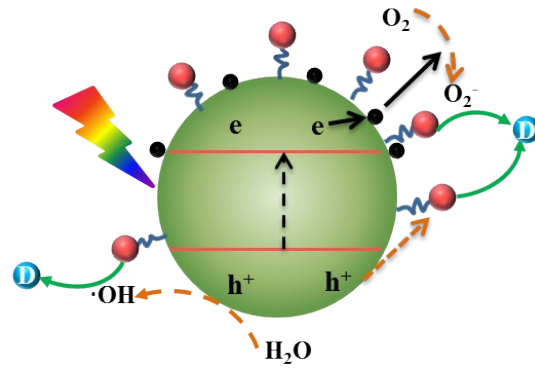

 CTAB
  dye
  Bi
  degraded products

Figure S5. Schematic diagram of the possible reaction mechanism of dyes removal on the Bi/BiOCl with CTAB under visible light irradiation
